# Supplementary material for: Individual or combined transcatheter arterial chemoembolization and radiofrequency ablation for hepatocellular carcinoma: a time-to-event meta-analysis
Source: PubMed Central journal article supplement (PMC7980330; doi:10.1186/s12957-021-02188-4), 2021-03-19

A

|                  | Random sequence generation (selection bias) | Allocation concealment (selection bias) | Blinding of participants and personnel (performance bias) | Blinding of outcome assessment (detection bias) | Incomplete outcome data (attrition bias) | Selective reporting (reporting bias) | Other bias |
|------------------|---------------------------------------------|-----------------------------------------|-----------------------------------------------------------|-------------------------------------------------|------------------------------------------|--------------------------------------|------------|
| Morimoto, M 2010 | +                                           | ?                                       | ?                                                         | ?                                               | ?                                        | +                                    | +          |
| Peng,Zw 2012     | +                                           | +                                       | -                                                         | ?                                               | +                                        | +                                    | +          |
| Peng,Zw 2013     | +                                           | +                                       | -                                                         | +                                               | +                                        | +                                    | +          |

B

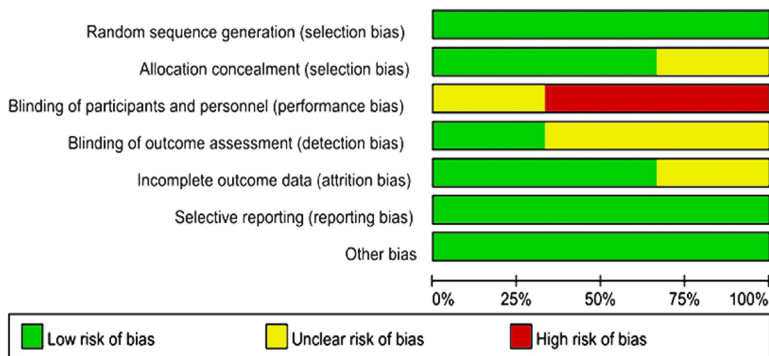

Supplement: 12957_2021_2188_MOESM8_ESM.pdf [file 12957_2021_2188_MOESM8_ESM.pdf]
