# Supplementary material for: Individual or combined transcatheter arterial chemoembolization and radiofrequency ablation for hepatocellular carcinoma: a time-to-event meta-analysis
Source: PubMed Central journal article supplement (PMC7980330; doi:10.1186/s12957-021-02188-4), 2021-03-19

**A**

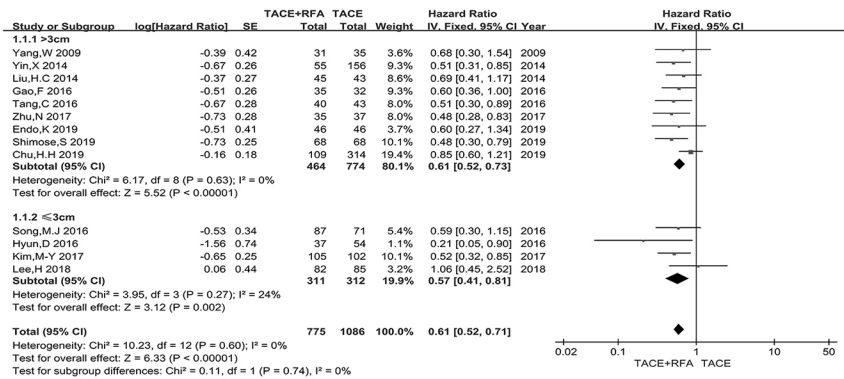

**B**

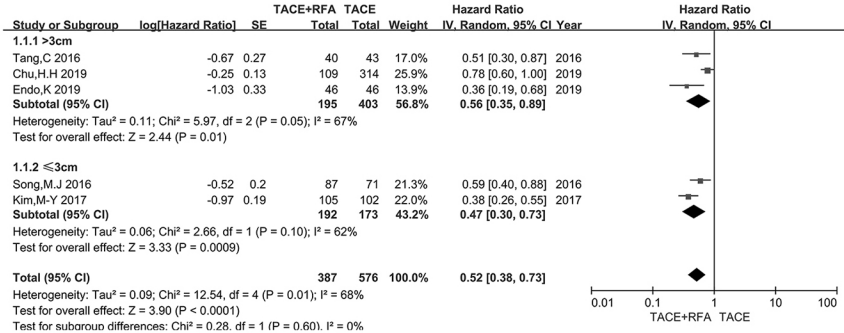

**C**

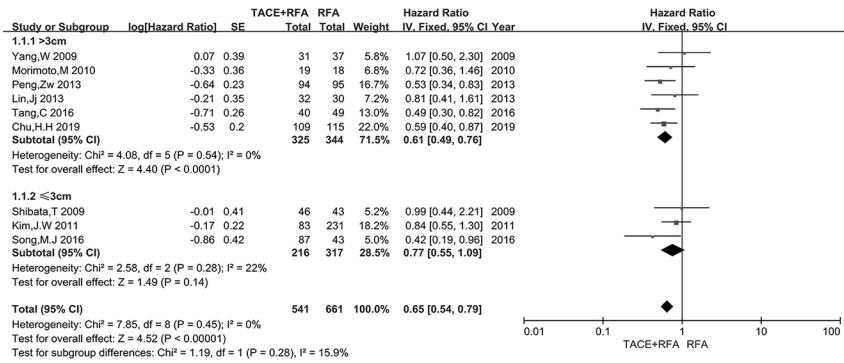

**D**

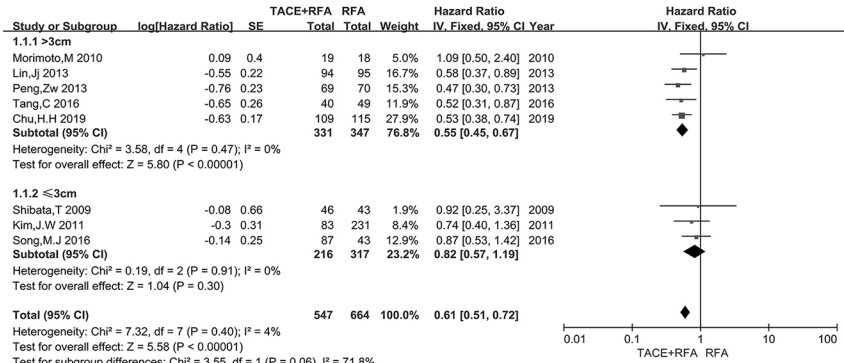

Supplement: 12957_2021_2188_MOESM9_ESM.pdf [file 12957_2021_2188_MOESM9_ESM.pdf]
